# Supplementary material for: A GC-MS Chemotaxonomic Study on Lipophilic Compounds in the Bark of S. aucuparia subsp. sibirica Trees from the Population Growing in Akademgorodok, Novosibirsk (Russia)
Source: MDPI journal article supplement (doi:10.3390/metabo13060768), 2023-06-19
Supplement: s1 [file s1]

Table S1. The ID numbers of samples and geographical location of the collected samples.

|     |                                                                                                             |
|-----|-------------------------------------------------------------------------------------------------------------|
| 1.  | coordinates: 54.84840, 83.12129; red-orange fruits, moderately bitter; collected 13.07.2022 and 11.02.2022. |
| 2.  | coordinates: 54.84024, 83.11121; orange fruits, moderately bitter; collected 02.07.2022 and 14.02.2022.     |
| 3.  | coordinates: 54.84351, 83.11314; orange fruits, non-bitter collected 02.07.2022 and 17.02.2022.             |
| 4.  | coordinates: 54.84797, 83.12050; orange fruits, moderately bitter; collected 13.06.2021 and 27.01.2022.     |
| 5.  | coordinates: 54.83514, 83.11054; orange fruits, moderately bitter; collected 02.07.2022 and 14.02.2022.     |
| 6.  | coordinates: 54.84962, 83.10374; orange fruits, non-bitter collected 02.07.2022 and 11.01.2022.             |
| 7.  | coordinates: 54.849367, 83.104057; orange fruits, non-bitter collected 02.07.2021 and 29.01.2022.           |
| 8.  | coordinates: 54.84828, 83.12216; orange fruits, non-bitter collected 13.06.2021 and 27.01.2022.             |
| 9.  | coordinates: 54.84440, 83.11603; orange fruits, non-bitter collected 02.07.2021 and 12.02.2022.             |
| 10. | coordinates: 54.848854, 83.103684; orange fruits, non-bitter collected 30.05.2021 and 17.03.2022.           |
| 11. | coordinates: 54.84966, 83.1068; orange fruits, moderately bitter; collected 16.09.2020 and 12.02.2022.      |
| 12. | coordinates: 54.84958, 83.10378; orange fruits, bitter; collected 11.08.2021 and 27.01.2022.                |
| 13. | coordinates: 54.849388, 83.104022; orange fruits, bitter; collected 13.06.2021 and 12.02.2022.              |
| 14. | coordinates: 54.84545, 83.10626; orange fruits, bitter; collected 02.07.2021 and 12.02.2022.                |
| 15. | coordinates: 54.84768, 83.11914; orange fruits, moderately bitter; collected 02.07.2021 and 17.03.2022.     |
| 16. | coordinates: 54.84788; 83.12018 red-orange fruits, moderately bitter; collected 27.05.22 and 14.02.22       |

Table S2. Compounds identified in extracts from *S.aucuparia* bark by GC/MS (summer gathering samples)

| #   | Compound                                             | RI   | RI <sub>lit</sub> | Q <sub>m</sub> | 1s    | 2s   | 3s    | 4s   | 5s   | 6s   | 7s    | 8s   | 9s   | 10s  | 11s   | 12s  | 13s  | 14s  | 15s  | 16s  |
|-----|------------------------------------------------------|------|-------------------|----------------|-------|------|-------|------|------|------|-------|------|------|------|-------|------|------|------|------|------|
| 001 | Benzaldehyde                                         | 957  | 965               | 106            | 11,49 | 0,49 | 33,14 | 0,73 | 0,31 | 8,72 | 33,83 | 0,56 | 8,74 | 5,06 | 13,53 | 0,09 | 0,35 | 0,05 | 0,25 | 2,67 |
| 002 | Benzyl alcohol                                       | 1019 | 1026              | 108            | 0,14  | 0,00 | 0,01  | 0,03 | 0,00 | 1,96 | 0,01  | 0,01 | 0,21 | 0,08 | 0,00  | 0,01 | 0,03 | 0,01 | 0,19 | 0,06 |
| 003 | Benzeneacetonitrile, $\alpha$ -oxo-                  | 1077 |                   | 131            | 0,05  | 0,10 | 0,01  | 0,08 | 0,06 | 0,02 | 0,00  | 0,16 | 0,21 | 0,21 | 0,21  | 0,02 | 0,00 | 0,01 | 0,35 | 0,06 |
| 004 | Benzeneacetic acid, $\alpha$ -methoxy-, methyl ester | 1088 | -                 | 121            | 0,36  | 0,00 | 0,00  | 0,00 | 0,00 | 8,40 | 0,00  | 0    | 0,07 | 0    | 0,00  | 0    | 0,13 | 0,00 | 0,00 | 0,05 |
| 005 | Benzeneacetonitrile                                  | 1111 | 1103              | 117            | 1,07  | 0,10 | 0,04  | 0,13 | 0,00 | 1,50 | 0,02  | 0,11 | 0,07 | 0,25 | 0,15  | 0,02 | 0,01 | 0,01 | 0,39 | 0,05 |
| 006 | Benzoic acid                                         | 1164 | 1159              | 122            | 0,51  | 0,41 | 0,06  | 1,50 | 0,34 | 0,59 | 0,01  | 0,45 | 1,77 | 1,64 | 0,60  | 0,09 | 0,03 | 0,01 | 0,75 | 0,51 |
| 007 | Coumaran                                             | 1192 | 1188              | 120            | 0,15  | 0,06 | 0,06  | 0,01 | 0,06 | 0,00 | 0,01  | 0,01 | 0,49 | 1,88 | 0,01  | 0,02 | 0,00 | 0,01 | 0,44 | 0,21 |
| 008 | 4-Vinyl-2-methoxyphenol                              | 1298 | 1317              | 135            | 0,03  | 0,02 | 0,40  | 0,03 | 0,12 | 0,31 | 0,02  | 0,02 | 0,80 | 0,12 | 0,03  | 0,04 | 0,01 | 0,01 | 0,11 | 0,19 |

|     |                                                       |      |      |         |      |      |      |      |      |      |      |      |      |       |      |      |      |      |      |       |
|-----|-------------------------------------------------------|------|------|---------|------|------|------|------|------|------|------|------|------|-------|------|------|------|------|------|-------|
| 009 | Phenol, 2,6-dimethoxy-                                | 1320 | 1320 | 154     | 0,15 | 0,50 | 0,04 | 0,03 | 0,02 | 0,12 | 0,02 | 0,01 | 0,58 | 0     | 0,03 | 0,02 | 0,01 | 0,01 | 0,01 | 0,19  |
| 010 | Eugenol                                               | 1341 | 1335 | 164     | 0,03 | 0,05 | 0,37 | 0,06 | 0,54 | 0,18 | 0,23 | 0,04 | 2,26 | 0     | 0,05 | 0,20 | 0,01 | 0,01 | 0,24 | 0,71  |
| 011 | Vanillin                                              | 1367 | 1357 | 152     | 0,03 | 0,04 | 0,10 | 0,04 | 0,06 | 0,17 | 0,06 | 0,01 | 0,03 | 0,13  | 0,00 | 0,50 | 0,01 | 0,03 | 0,03 | 0,58  |
| 012 | trans-Isoeugenol                                      | 1436 | 1454 | 164     | 0,05 | 0,06 | 0,01 | 0,04 | 0,04 | 0,31 | 0,01 | 0,01 | 0,37 | 0,53  | 0,00 | 0,28 | 0,02 | 0,02 | 0,02 | 0,09  |
| 013 | Vanillyl methyl ketone                                | 1495 | 1485 | 180     | 0,09 | 0,02 | 0,01 | 0,01 | 0,04 | 0,39 | 0,01 | 0,01 | 1,20 | 0     | 0,12 | 0,31 | 0,01 | 0,01 | 0,40 | 0,12  |
| 014 | Mandelamide                                           | 1522 | 1536 | 107     | 0,07 | 0,46 | 0,00 | 0,04 | 0,02 | 1,05 | 0,00 | 0,01 | 0,05 | 0     | 0,05 | 0,13 | 0,01 | 0,01 | 0,11 | 0,17  |
| 015 | 3',5'-Dimethoxyacetophenone                           | 1533 |      | 180     | 0,03 | 0,04 | 0,09 | 0,02 | 0,03 | 0,10 | 0,08 | 0,05 | 0,24 | 0     | 0,04 | 0,11 | 0,01 | 0,01 | 0,01 | 0,08  |
| 016 | Butyrovaniellone                                      | 1563 | 1592 | 151     | 0,24 | 0,19 | 0,07 | 0,12 | 0,20 | 1,50 | 0,08 | 0,14 | 1,21 | 1,94  | 0,66 | 0    | 0,01 | 0,01 | 0,01 | 0,29  |
| 017 | Phenol, 2,6-dimethoxy-4-(2-propenyl)-                 | 1561 | 1572 | 194     | 0,03 | 0,06 | 0,18 | 0,04 | 0,08 | 0,07 | 0,36 | 0,85 | 3,16 | 0     | 0,35 | 0,05 | 0,01 | 0,01 | 0,02 | 0,73  |
| 018 | 3,4,5-Trimethoxyphenol                                | 1563 |      | 169     | 0,11 | 0,01 | 0,10 | 0,03 | 0,01 | 0,40 | 0,11 | 0,03 | 1,36 | 0     | 0,00 | 0,07 | 0,08 | 0,01 | 0,01 | 0,79  |
| 019 | Benzenepropanol, 4-hydroxy-3-methoxy-                 | 1620 | 1729 | 180     | 0,00 | 0,01 | 0,19 | 0,01 | 0,16 | 0,04 | 3,21 | 0,01 | 0,95 | 0,78  | 0,14 | 0,01 | 0,00 | 0,00 | 0,00 | 0,36  |
| 020 | (E)-2,6-Dimethoxy-4-(prop-1-en-1-yl)phenol            | 1676 | 1704 | 194     | 0,10 | 0,07 | 0,71 | 0,06 | 0,10 | 0,28 | 0,56 | 0,05 | 0,23 | 2,18  | 0,04 | 0,08 | 0,01 | 0,03 | 0,03 | 0,31  |
| 021 | 2-Propanone, 1-hydroxy-3-(4-hydroxy-3-methoxyphenyl)- | 1693 | 1736 | 196     | 0,01 | 0,02 | 0,12 | 0,01 | 0,01 | 0,03 | 0,14 | 0,01 | 0,33 | 0     | 0,01 | 0,01 | 0,01 | 0,01 | 0,01 | 1,31  |
| 022 | Desaspidinol                                          | 1736 |      | 167     | 0,22 | 0,06 | 0,10 | 0,07 | 0,09 | 1,64 | 0,16 | 0,07 | 0,48 | 0     | 0,05 | 0,03 | 0,01 | 0,01 | 0,03 | 1,28  |
| 023 | Tetradecanoic acid                                    | 1744 | 1752 | 228     | 0,00 | 0,10 | 0,39 | 0,06 | 0,11 | 0,00 | 0,37 | 0,01 | 0,12 | 0     | 0,04 | 0,02 | 0,01 | 0,01 | 0,01 | 1,29  |
| 024 | 3,5-Dimethoxy-4-hydroxyphenylacetic acid              | 1755 | 1744 | 167 212 | 0,19 | 0,02 | 0,00 | 0,02 | 0,04 | 0,50 | 0,00 | 0,03 | 0,00 | 0     | 0,04 | 0,01 | 0,01 | 0,01 | 0,04 | 0,00  |
| 025 | Dehydrovomifoliol                                     | 1767 | 1800 | 124     | 0,04 | 0,04 | 0,07 | 0,01 | 0,05 | 0,06 | 0,02 | 0,04 | 0,07 | 0     | 0,00 | 0,01 | 0,01 | 0,01 | 0,06 | 0,97  |
| 026 | Acetosyringon                                         | 1783 | 1744 | 181     | 0,52 | 0,06 | 0,32 | 0,82 | 0,10 | 1,22 | 0,03 | 0,01 | 1,95 | 0     | 0,03 | 0,09 | 0,01 | 0,01 | 0,13 | 0,49  |
| 027 | 3,4-Dimethoxycinnamic acid                            | 1792 | 1926 | 208     | 0,04 | 0,17 | 0,43 | 0,09 | 0,10 | 0,03 | 0,41 | 0,73 | 0,88 | 0     | 0,25 | 0,01 | 0,04 | 0,01 | 0,05 | 0,05  |
| 028 | Neophytadiene                                         | 1836 | 1842 | 123     | 0,07 | 0,81 | 0,25 | 0,12 | 0,83 | 0,03 | 0,66 | 0,05 | 0,24 | 2,72  | 0,04 | 0,01 | 0,01 | 0,01 | 0,01 | 0,17  |
| 029 | Pentadecanoic acid                                    | 1838 | 1848 | 242     | 0,00 | 0,02 | 0,06 | 0,23 | 0,02 | 0,01 | 0,10 | 0,19 | 0,04 | 0,28  | 0,19 | 0,03 | 0,01 | 0,01 | 0,01 | 0,08  |
| 030 | Neophytadiene 2                                       | 1839 | 1842 | 123     | 0,01 | 0,21 | 0,18 | 0,02 | 0,24 | 0,02 | 0,10 | 0,01 | 0,56 | 0,72  | 0,02 | 0,01 | 0,01 | 0,01 | 0,01 | 0,06  |
| 031 | 1-Hexadecanol                                         | 1869 | 1880 | 83      | 0,00 | 0,17 | 0,11 | 0,06 | 0,14 | 0,00 | 0,08 | 0,02 | 0,18 | 0,34  | 0,02 | 0,01 | 0,00 | 0,00 | 0,00 | 0,03  |
| 032 | Neophytadiene 3                                       | 1883 | 1842 | 123     | 0,03 | 0,23 | 0,05 | 0,02 | 0,23 | 0,03 | 0,11 | 0,01 | 0,08 | 1,55  | 0,07 | 0,06 | 0,01 | 0,01 | 0,01 | 0,05  |
| 033 | Hexadecanoic acid, methyl ester                       | 1924 | 1953 | 236     | 0,00 | 0,02 | 0,04 | 0,06 | 0,02 | 0,01 | 0,62 | 0,01 | 0,19 | 0,72  | 0,00 | 0,01 | 0,01 | 0,00 | 0,00 | 0,08  |
| 034 | Palmitoleic acid                                      | 1926 | 1926 | 74      | 0,00 | 0,15 | 0,51 | 0,05 | 0,18 | 0,03 | 0,27 | 0,30 | 0,56 | 0,46  | 0,03 | 0,01 | 0,01 | 0,01 | 0,01 | 0,19  |
| 035 | Hexadecanoic acid                                     | 1943 | 1942 | 256     | 3,09 | 0,66 | 2,22 | 0,61 | 0,70 | 0,20 | 2,29 | 0,53 | 2,13 | 3,24  | 1,32 | 0,20 | 0,69 | 0,76 | 0,79 | 0,61  |
| 036 | Heptadecanoic acid                                    | 2060 | 2071 | 37,270  | 0,00 | 0,03 | 0,09 | 0,01 | 0,03 | 0,01 | 0,13 | 0,01 | 0,01 | 0,41  | 0,00 | 0,01 | 0,01 | 0,01 | 0,01 | 0,04  |
| 037 | Aucuparin                                             | 2050 | 2063 | 82      | 0,39 | 0,05 | 0,00 | 0,06 | 0,06 | 0,03 | 0,00 | 0,04 | 0,00 | 0     | 0,02 | 0,07 | 0,01 | 0,02 | 0,71 | 0,00  |
| 038 | 1-Octadecanol                                         | 2073 | 2074 | 97      | 0,15 | 0,03 | 0,08 | 0,07 | 0,04 | 0,07 | 0,06 | 0,05 | 0,01 | 0,29  | 0,05 | 0,05 | 0,01 | 0,01 | 0,01 | 0,02  |
| 039 | Heneicosane                                           | 2098 | 2100 | 57      | 0,00 | 0,02 | 0,00 | 0,03 | 0,06 | 0,00 | 0,36 | 0,03 | 0,00 | 0     | 0,07 | 0    | 0,01 | 0,02 | 0,19 | 0,03  |
| 040 | Phytol                                                | 2107 | 2114 | 71      | 5,94 | 0,52 | 0,10 | 0,09 | 0,56 | 2,70 | 0,10 | 0,09 | 3,24 | 16,36 | 0,11 | 0,95 | 0,60 | 0,12 | 0,13 | 0,89  |
| 041 | Linoleic acid                                         | 2113 | 2112 | 280     | 3,47 | 0,06 | 0,37 | 0,05 | 0,13 | 0,43 | 0,53 | 0,04 | 0,83 | 4,40  | 1,38 | 0,08 | 0,01 | 0,01 | 0,01 | 0,21  |
| 042 | Linolenic acid                                        | 2117 | 2115 | 79      | 1,86 | 0,27 | 0,36 | 0,12 | 0,41 | 0,33 | 1,31 | 0,27 | 0,41 | 1,57  | 0,60 | 0,05 | 0,03 | 0,01 | 0,01 | 0,05  |
| 043 | Oleic acid                                            | 2119 | 2134 | 264     | 2,64 | 0,13 | 0,43 | 0,13 | 0,17 | 0,11 | 0,22 | 0,17 | 0,62 | 0     | 0,51 | 0,25 | 0,02 | 0,02 | 0,20 | 0,16  |
| 044 | Octadecanoic acid                                     | 2143 | 2153 | 284     | 1,63 | 0,08 | 0,91 | 0,12 | 0,14 | 0,27 | 0,53 | 0,05 | 1,53 | 1,24  | 0,22 | 0,01 | 0,01 | 0,01 | 0,01 | 0,23  |
| 045 | 2'-Methoxyaucuparin                                   | 2169 |      | 260     | 0,07 | 0,00 | 0,00 | 0,00 | 0,01 | 0,03 | 0,00 | 0,01 | 0,01 | 0     | 0,00 | 0,01 | 0,00 | 0,01 | 0,01 | 0,01  |
| 046 | Docosane                                              | 2201 | 2200 | 57      | 0,00 | 0,01 | 0,09 | 0,02 | 0,01 | 0,00 | 0,02 | 0,01 | 0,03 | 0     | 0,01 | 0,01 | 0,01 | 0,01 | 0,00 | 0,03  |
| 047 | Benzyl $\beta$ -D-glucoside                           | 2228 |      | 91      | 0,21 | 0,03 | 0,11 | 0,13 | 0,04 | 2,54 | 0,10 | 0,13 | 0,03 | 2,81  | 0,16 | 0,09 | 0,01 | 0,00 | 0,00 | 24,28 |
| 048 | 1-Eicosanol                                           | 2275 | 2273 | 97      | 0,07 | 0,03 | 0,13 | 0,04 | 0,04 | 0,16 | 0,04 | 0,05 | 0,24 | 0,23  | 0,04 | 0,03 | 0,01 | 0,01 | 0,01 | 0,08  |
| 049 | Tricosane                                             | 2304 | 2304 | 57      | 0,02 | 0,04 | 0,03 | 0,05 | 0,05 | 0,00 | 0,03 | 0,06 | 0,03 | 0,26  | 0,05 | 0,02 | 0,02 | 0,03 | 0,03 | 0,09  |

|     |                                                                 |      |      |         |       |       |       |       |       |       |       |       |       |       |       |       |       |       |       |       |
|-----|-----------------------------------------------------------------|------|------|---------|-------|-------|-------|-------|-------|-------|-------|-------|-------|-------|-------|-------|-------|-------|-------|-------|
| 050 | 4,8,12,16-Tetramethylheptadecan-4-olide                         | 2331 | 2364 | 99      | 0,03  | 0,01  | 0,05  | 0,01  | 0,01  | 0,25  | 0,01  | 0,01  | 0,11  | 4,31  | 0,01  | 0,01  | 0,01  | 0,01  | 0,01  | 0,02  |
| 051 | Eicosanoic acid                                                 | 2343 | 2366 | 312     | 0,03  | 0,04  | 0,18  | 0,11  | 0,05  | 0,15  | 0,10  | 0,07  | 0,52  | 0,45  | 0,06  | 0,04  | 0,01  | 0,02  | 0,02  | 0,09  |
| 052 | 1-Heneicosanol                                                  | 2373 | 0    | 97      | 0,03  | 0,01  | 0,00  | 0,03  | 0,02  | 0,00  | 0,00  | 0,01  | 0,00  |       | 0,00  | 0,02  | 0,01  | 0,01  | 0,00  | 0,00  |
| 053 | Tetracosane                                                     | 2404 | 2404 | 57      | 0,00  | 0,00  | 0,11  | 0,00  | 0,00  | 0,00  | 0,11  | 0     | 0,03  | 0,33  | 0,00  | 0     | 0,01  | 0,02  | 0,02  | 0,00  |
| 054 | 1,1'-Biphenyl, 6-hydroxy-4,2',3',4'-tetramethoxy-               | 2413 | 0    | 290     | 0,09  | 0,07  | 0,00  | 0,01  | 0,00  | 0,00  | 0,00  | 0,39  | 0,00  | 0     | 0,00  | 0,01  | 0,01  | 0,00  | 0,00  | 0,00  |
| 055 | Octadecanamide, N-ethyl                                         | 2434 |      | 87      | 0,12  | 0,02  | 0,00  | 0,00  | 0,03  | 0,00  | 0,00  | 0     | 0,00  | 0,56  | 0,02  | 0     | 0,01  | 0,01  | 0,01  | 0,00  |
| 056 | Behenic alcohol                                                 | 2472 | 2457 | 385     | 2,21  | 0,78  | 0,18  | 1,14  | 0,88  | 0,87  | 1,13  | 0,73  | 0,03  | 0,57  | 0,69  | 0,77  | 0,14  | 0,17  | 0,18  | 0,64  |
| 057 | Dehydroabietic acid                                             | 2477 | 2475 | 97      | 0,21  | 0,58  | 1,97  | 0,13  | 0,58  | 0,00  | 0,30  | 0,18  | 0,50  |       | 0,00  | 0     | 0,02  | 0,35  | 0,00  | 0,26  |
| 058 | Prunasin                                                        | 2477 | 0    | 117     | 16,09 | 41,32 | 7,63  | 36,68 | 30,92 | 3,10  | 1,61  | 36,62 | 2,14  | 3,48  | 6,80  | 7,16  | 0,21  | 2,09  | 2,17  | 1,05  |
| 059 | Pentacosane                                                     | 2501 | 2504 | 57      | 0,00  | 0,09  | 0,18  | 0,26  | 0,09  | 0,00  | 0,24  | 0,01  | 0,01  | 1,03  | 0,00  | 0,41  | 0,03  | 0,01  | 0,01  | 0,01  |
| 060 | Docosanoic acid                                                 | 2546 | 2567 | 340     | 0,16  | 0,18  | 0,13  | 0,40  | 0,34  | 1,77  | 0,22  | 0,19  | 1,00  | 0,10  | 0,23  | 0,18  | 0,03  | 0,10  | 0,11  | 0,17  |
| 061 | Mm 318 C <sub>20</sub> H <sub>30</sub> O <sub>3</sub>           | 2604 | 2366 | 207     | 0,18  | 0,06  | 0,04  | 0,05  | 0,05  | 0,26  | 0,00  | 0,05  | 0,04  | 0     | 0,11  | 0,21  | 0,23  | 0,36  | 0,00  | 0,15  |
| 062 | Hexacosane                                                      | 2600 | 2600 | 57      | 0,00  | 0,00  | 0,32  | 0,00  | 0,00  | 0,00  | 0,44  | 0     | 0,00  | 0,33  | 0,00  | 0     | 0,01  | 0,01  | 0,01  | 0,09  |
| 063 | Tetracosanal                                                    | 2614 | 2614 | 334     | 0,00  | 0,04  | 0,00  | 0,01  | 0,03  | 0,00  | 0,00  | 0,01  | 0,00  |       | 0,00  | 0,01  | 0,00  | 0,01  | 0,01  | 0,00  |
| 064 | 1-Tetracosanol                                                  | 2679 | 2678 | 97      | 0,08  | 1,73  | 0,03  | 2,83  | 1,86  | 0,15  | 0,10  | 1,76  | 0,87  | 3,73  | 1,92  | 0,46  | 0,24  | 0,27  | 0,28  | 1,34  |
| 065 | Heptacosane                                                     | 2698 | 2704 | 57      | 0,01  | 0,11  | 0,35  | 0,01  | 0,15  | 0,00  | 0,62  | 0,01  | 0,01  | 1,14  | 0,04  | 0,01  | 0,05  | 0,04  | 0,04  | 0,01  |
| 066 | Tetracosanoic acid                                              | 2744 | 2685 | 368     | 0,02  | 0,09  | 0,00  | 0,22  | 0,10  | 0,02  | 0,00  | 0,01  | 0,00  |       | 0,00  | 0,01  | 0,01  | 0,02  | 0,14  | 0,03  |
| 067 | Mm 334 c 95, 107 C <sub>20</sub> H <sub>30</sub> O <sub>4</sub> | 2787 | -    | 207     | 0,22  | 0,05  | 0,01  | 0,00  | 0,04  | 0,54  | 0,00  | 0,02  | 0,00  | 0,26  | 0,11  | 0,10  | 0,09  | 0,07  | 0,07  | 0,16  |
| 068 | Mm 332 c 97 C <sub>20</sub> H <sub>28</sub> O <sub>4</sub>      | 2801 | -    | 207     | 0,80  | 0,07  | 0,04  | 0,09  | 0,06  | 0,43  | 0,00  | 0,09  | 0,00  | 0,23  | 2,86  | 0,33  | 0,38  | 0,59  | 0,62  | 0,25  |
| 069 | Tetracosyl acetate                                              | 2804 | 2808 | 97      | 0,09  | 0,11  | 0,11  | 0,04  | 0,07  | 0,04  | 0,15  | 0,09  | 0,32  |       | 0,26  | 0,09  | 0,01  | 0,00  | 0,06  | 0,00  |
| 070 | Mm 334 c 95, 107 C <sub>20</sub> H <sub>30</sub> O <sub>4</sub> | 2804 | 0    | 207     | 0,77  | 0,97  | 0,15  | 2,28  | 3,21  | 2,14  | 0,00  | 1,06  | 0,04  | 0     | 0,61  | 2,99  | 3,06  | 4,48  | 4,05  | 0,78  |
| 071 | Squalene                                                        | 2811 | 2817 | 69      | 2,32  | 2,07  | 8,04  | 1,73  | 5,76  | 1,55  | 7,93  | 2,13  | 7,78  | 1,56  | 2,65  | 1,05  | 0,45  | 0,94  | 1,03  | 4,56  |
| 072 | Hexacosanal                                                     |      | 2832 | 57, 82  | 0,00  | 0,60  | 0     | 0     | 2,13  | 0     | 0     | 0     | 0     | 0     | 0     | 0     | 0     | 1,85  | 2,21  | 0,21  |
| 073 | Tocospiro A                                                     | 2825 | 2860 | 419     | 0,03  | 0,00  | 0,01  | 0,01  | 0,01  | 0,29  | 0,03  | 0,01  | 0,02  | 0     | 0,01  | 0,01  | 0,06  | 0,00  | 0,76  | 0,01  |
| 074 | Mm 332 C <sub>20</sub> H <sub>28</sub> O <sub>4</sub>           | 2831 | -    | 207     | 0,41  | 0,07  | 0,01  | 0,10  | 0,08  | 0,58  | 0,00  | 0,11  | 0,01  | 0     | 0,74  | 0,28  | 0,31  | 0,50  | 0,66  | 0,42  |
| 075 | Tocospiro B                                                     | 2845 | 2882 | 419     | 0,03  | 0,01  | 0,01  | 0,01  | 0,01  | 0,17  | 0,02  | 0     | 0,03  | 0     | 0,00  | 0,01  | 0,06  | 0,00  | 0,93  | 0,01  |
| 076 | 1-Hexacosanol                                                   | 2883 | 2852 | 97      | 6,32  | 4,97  | 1,30  | 2,87  | 5,65  | 2,35  | 1,42  | 2,17  | 0,04  | 3,10  | 4,78  | 0,29  | 2,74  | 7,81  | 8,13  | 0,02  |
| 077 | Nonacosane                                                      | 2900 | 2900 | 57      | 0,00  | 0,16  | 0,12  | 0,09  | 0,17  | 0,00  | 1,18  | 0,06  | 0,05  | 1,73  | 0,09  | 0,11  | 0,07  | 0,05  | 0,05  | 0,02  |
| 078 | A-Neoleana-3(5),12-diene                                        | 2904 |      | 365     | 0,35  | 0,07  | 0,65  | 0,12  | 0,30  | 0,17  | 0,54  | 0,39  | 0,64  | 3,72  | 0,62  | 0,08  | 0,51  | 0,68  | 0,44  | 0,10  |
| 079 | Diterpenoic acid Mm Mm358                                       | 2914 |      | 207     | 0,32  | 0,12  | 0,00  | 0,09  | 0,08  | 4,18  | 0,00  | 0,10  | 0,00  | 0     | 0,45  | 0,54  | 0,31  | 0,54  | 0,02  | 0,14  |
| 080 | Stigmastan-3,5,22-trien                                         | 3025 | 2981 | 394     | 0,03  | 0,15  | 0,00  | 0,05  | 0,15  | 0,02  | 0,02  | 0,06  | 0,84  | 0,12  | 0,07  | 0     | 0,01  | 0,01  | 0,01  | 0,15  |
| 081 | Stigmasta-3,5-diene                                             | 3046 |      | 396     | 0,07  | 0,06  | 0,09  | 0,14  | 0,06  | 0,10  | 0,14  | 0,10  | 0,59  | 0     | 0,09  | 0,09  | 0,41  | 0,18  | 0,02  | 0,14  |
| 082 | Cholesterol                                                     | 3054 | 3087 | 386     | 0,07  | 0,03  | 0,10  | 0,03  | 0,04  | 0,20  | 0,11  | 0,04  | 0,49  | 0,18  | 0,04  | 0,05  | 0,13  | 0,01  | 0,01  | 0,03  |
| 083 | Vitamin E                                                       | 3084 | 3138 | 430     | 1,23  | 3,84  | 2,96  | 1,13  | 4,18  | 0,76  | 2,73  | 0,85  | 0,97  | 0     | 0,13  | 1,06  | 1,26  | 0,03  | 0,13  | 1,16  |
| 084 | Campesterol                                                     | 3150 | 3131 | 400     | 0,03  | 0,02  | 0,87  | 0,04  | 0,02  | 0,03  | 0,46  | 0,04  | 0,00  | 0,54  | 0,05  | 0,04  | 0,17  | 0,00  | 0,15  | 0,00  |
| 085 | β-Sitosterol                                                    | 3232 | 3230 | 414     | 2,13  | 3,55  | 24,57 | 3,53  | 3,56  | 1,90  | 22,79 | 2,98  | 26,62 | 12,37 | 3,41  | 3,44  | 5,69  | 0,94  | 0,70  | 2,19  |
| 086 | Fucosterol                                                      | 3264 | 3293 | 314     | 2,91  | 0,45  | 2,10  | 0,00  | 0,00  | 0,00  | 4,85  | 1,42  | 4,23  | 0     | 0,01  | 1,05  | 1,54  | 0,00  | 0,00  | 1,24  |
| 087 | β-Amyrin                                                        | 3245 | 3337 | 218     | 0,23  | 1,39  | 1,10  | 0,47  | 0,45  | 0,00  | 0,00  | 0,49  | 0,00  | 0,98  | 0,38  | 1,60  | 1,03  | 0,28  | 0,43  | 0,62  |
| 088 | Lup-20(29)-en-3-one                                             | 3267 | 3384 | 424     | 2,55  | 0,28  | 0,33  | 0,35  | 0,35  | 0,80  | 0,90  | 0,42  | 2,36  | 0     | 0,54  | 0     | 0,00  | 0,91  | 0,85  | 0,00  |
| 089 | α-Amyrin                                                        | 3275 | 3376 | 218     | 0,00  | 1,06  | 0,05  | 1,15  | 0,00  | 0,09  | 0,00  | 0     | 0,00  | 0,71  | 0,00  | 0     | 0,00  | 0,00  | 0,00  | 0,71  |
| 090 | Lupeol                                                          | 3288 | 3270 | 426     | 13,00 | 20,93 | 0,75  | 32,57 | 20,73 | 29,27 | 2,54  | 35,70 | 5,22  | 0     | 34,65 | 67,73 | 70,06 | 67,14 | 61,43 | 32,46 |
| 091 | Not identified Mm 444                                           | 3292 |      | 125,175 | 0,88  | 1,28  | 0,00  | 0,54  | 0,96  | 1,43  | 0,00  | 1,19  | 0,00  | 0     | 0,97  | 0     | 0,00  | 0,99  | 1,53  | 0,00  |
| 092 | Stigmasta-3,5-dien-7-one                                        | 3305 |      | 174     | 0,17  | 0,11  | 0,73  | 0,20  | 0,09  | 0,00  | 0,20  | 0,08  | 0,00  | 0     | 0,00  | 0,82  | 0,11  | 0,71  | 0,00  | 0,01  |
| 093 | Not identified Mm 442                                           | 3314 |      | 125     | 0,77  | 0,93  | 0,00  | 0,24  | 0,88  | 1,37  | 0,00  | 0,60  | 0,00  | 0     | 0,00  | 0     | 0,81  | 1,03  | 1,46  | 1,64  |
| 094 | Allobetulin                                                     | 3320 |      | 189     | 1,82  | 0,54  | 0,00  | 0,34  | 0,51  | 1,76  | 0,00  | 0,42  | 0,00  | 0     | 0,07  | 0     | 0,39  | 0,20  | 1,88  | 1,71  |
| 095 | β-Sitostenone                                                   | 3339 | 3483 | 412     | 0,07  | 0,19  | 0,15  | 0,15  | 0,10  | 0,45  | 0,38  | 0,07  | 0,00  | 0     | 0,25  | 0,16  | 0,11  | 0,39  | 0,47  | 0,38  |

|     |                 |      |       |     |      |      |      |      |      |      |   |      |      |   |      |      |      |      |      |      |
|-----|-----------------|------|-------|-----|------|------|------|------|------|------|---|------|------|---|------|------|------|------|------|------|
| 096 | Lupeol acetate  | 3409 |       | 189 | 0,00 | 0,11 | 0,17 | 1,02 | 0,34 | 0,47 | 0 | 1,11 | 0,00 | 0 | 0,68 | 0    | 0,59 | 0,19 | 0,12 | 2,47 |
| 097 | Taraxasterol    | 3437 |       | 189 | 1,45 | 1,13 | 0    | 0,76 | 1,56 | 3,02 | 0 | 0,65 | 0,00 | 0 | 1,60 | 0    | 0,27 | 1,56 | 0,42 | 0,13 |
| 098 | Dotriacontanal  | 3442 | 3451* | 82  | 1,87 | 0,18 | 0    | 0,81 | 0,00 | 1,00 | 0 | 0    | 0,00 | 0 | 0,73 | 0    | 0,26 | 0,23 | 0,26 | 0,00 |
| 099 | Not identified  | 3448 |       | 428 | 1,55 | 1,00 | 0    | 0,09 | 1,42 | 0    | 0 | 0,97 | 0,00 | 0 | 1,54 | 0,43 | 0,32 | 0,08 | 0,00 | 0,00 |
| 100 | Betulinaldehyde | 3551 |       | 189 | 0,21 | 0,29 | 0    | 0,66 | 0,00 | 0    | 0 | 0,30 | 0,00 | 0 | 0,70 | 0,39 | 0,90 | 0,12 | 0,00 | 0,00 |
| 101 | Betulin         | 3572 |       | 189 | 0,04 | 0,06 | 0    | 0,18 | 2,94 | 0    | 0 | 0,07 | 2,07 | 0 | 7,90 | 0,31 | 1,50 | 1,40 | 0,00 | 0,00 |

\*estimated by RI<sub>lit</sub> of homologues

Table S3. Compounds identified in extracts from *S.aucuparia* bark by GC/MS (winter gathering samples)

| #   | compounds                                             | RI   | RI <sub>lit</sub> | Q <sub>m</sub> | 1w   | 2w    | 3w   | 4w   | 5w   | 6w    | 7w    | 8w   | 9w   | 10w  | 11w  | 12w  | 13w  | 14w  | 15w  | 16w  |
|-----|-------------------------------------------------------|------|-------------------|----------------|------|-------|------|------|------|-------|-------|------|------|------|------|------|------|------|------|------|
| 001 | Benzaldehyde                                          | 957  | 965               | 106            | 6,87 | 17,75 | 0,61 | 7,68 | 2,34 | 34,13 | 38,68 | 5,51 | 0,06 | 0,62 | 0,12 | 0,54 | 9,30 | 5,01 | 0,71 | 0,11 |
| 002 | Benzyl alcohol                                        | 1019 | 1026              | 108            | 0,09 | 0,55  | 0,01 | 0,05 | 0,06 | 0     | 0,20  | 0,24 | 0    | 0,21 | 0    | 0    | 0,11 | 0    | 0,17 | 0    |
| 003 | Benzeneacetonitrile, $\alpha$ -oxo-                   | 1077 |                   | 131            | 0,15 | 0,78  | 0,01 | 0,19 | 0,17 | 1,56  | 0,14  | 0    | 0    | 0,01 | 0    | 0,07 | 0,14 | 0,13 | 0,01 | 0    |
| 004 | Benzeneacetic acid, $\alpha$ -methoxy-, methyl ester  | 1088 | -                 | 121            | 1,70 | 0,57  | 0,01 | 0,04 | 0,07 | 0,58  | 0,24  | 4,55 | 0    | 0,10 | 0    | 0,01 | 1,12 | 0,19 | 0,07 | 0,01 |
| 005 | Benzeneacetonitrile                                   | 1111 | 1103              | 117            | 0,09 | 0,38  | 0,03 | 0,26 | 1,16 | 1,18  | 0,67  | 0,49 | 0    | 0,02 | 0    | 0,07 | 0,08 | 0,26 | 0,02 | 0    |
| 006 | Benzoic acid                                          | 1164 | 1159              | 122            | 0,62 | 1,11  | 1,52 | 0,68 | 7    | 1,81  | 1,13  | 0,90 | 0    | 0,55 | 0    | 0,05 | 0,28 | 1,80 | 0,54 | 0    |
| 007 | Coumaran                                              | 1192 | 1188              | 120            | 0,07 | 0,05  | 0,26 | 0,08 | 0,05 | 0     | 0,07  | 0,01 | 0    | 0,66 | 0    | 0,01 | 0,01 | 0,06 | 0,25 | 0    |
| 008 | 4-Vinyl-2-methoxyphenol                               | 1298 | 1317              | 135            | 0,15 | 0,05  | 1,05 | 0,06 | 0,02 | 0,01  | 0,07  | 0,08 | 0    | 0,21 | 0    | 0,04 | 0,01 | 0,06 | 0,17 | 0    |
| 009 | Phenol, 2,6-dimethoxy-                                | 1320 | 1320              | 154            | 0,01 | 0,01  | 0,02 | 0,01 | 0,01 | 0,04  | 0,07  | 0,01 | 0    | 0,04 | 0    | 0,01 | 0,01 | 0,05 | 0,04 | 0    |
| 010 | Eugenol                                               | 1341 | 1335              | 164            | 0,04 | 0,05  | 0,47 | 0,08 | 0,23 | 0,09  | 0,13  | 0,22 | 0    | 0,02 | 0    | 0,31 | 0,15 | 0,32 | 0,06 | 0    |
| 011 | Vanillin                                              | 1367 | 1357              | 152            | 0,10 | 0,05  | 0,01 | 0,04 | 0,03 | 0,16  | 0,06  | 0,66 | 0    | 0,01 | 0    | 0,01 | 0,03 | 0,02 | 0,02 | 0    |
| 012 | trans-Isoeugenol                                      | 1436 | 1454              | 164            | 0,10 | 0,06  | 0,01 | 0,07 | 0,06 | 0,19  | 0,10  | 0,15 | 0    | 0,02 | 0    | 0,02 | 0,08 | 0,14 | 0,03 | 0    |
| 013 | Vanillyl methyl ketone                                | 1495 | 1485              | 180            | 0,07 | 0,08  | 0,01 | 0,12 | 0,14 | 0,12  | 0,16  | 0,09 | 0,01 | 0,01 | 0,01 | 0,13 | 0,01 | 0,21 | 0,01 | 0    |
| 014 | Mandelamide                                           | 1522 | 1536              | 107            | 0,07 | 0,08  | 0,07 | 0,12 | 0,16 | 0     | 0,34  | 0,08 | 0    | 0,01 | 0    | 0,02 | 0,19 | 0,19 | 0,04 | 0    |
| 015 | 3',5'-Dimethoxyacetophenone                           | 1533 |                   | 180            | 0,01 | 0,03  | 0,09 | 0,01 | 0,03 | 0,04  | 0,14  | 0,01 | 0,01 | 0,15 | 0    | 0,01 | 0,01 | 0,07 | 0,10 | 0    |
| 016 | Butyrovaniollone                                      | 1563 | 1592              | 151            | 0,03 | 0,26  | 0,15 | 0,48 | 0,79 | 1,57  | 1,11  | 0,14 | 0    | 0,21 | 0    | 0,15 | 0,19 | 1,13 | 0,89 | 0    |
| 017 | Phenol, 2,6-dimethoxy-4-(2-propenyl)-                 | 1561 | 1572              | 194            | 0,04 | 0,02  | 0,29 | 0,06 | 0,02 | 0     | 0,01  | 0,02 | 0    | 0,10 | 0    | 0,09 | 0,03 | 0,37 | 0,16 | 0    |
| 018 | 3,4,5-Trimethoxyphenol                                | 1563 |                   | 169            | 0    | 0     | 0,01 | 0,01 | 0    | 0,01  | 0,06  | 0    | 0    | 0,01 | 0    | 0,03 | 0,16 | 0,02 | 0,01 | 0    |
| 019 | Benzenepropanol, 4-hydroxy-3-methoxy-                 | 1620 | 1729              | 180            | 0    | 0,06  | 0,01 | 0,01 | 0,03 | 0     | 0,06  | 0,01 | 0    | 0,01 | 0    | 0,14 | 0,01 | 0,11 | 0,01 | 0    |
| 020 | (E)-2,6-Dimethoxy-4-(prop-1-en-1-yl)phenol            | 1676 | 1704              | 194            | 0,03 | 0,02  | 0,01 | 0,02 | 0,03 | 0,07  | 0,07  | 0,04 | 0,01 | 0,01 | 0    | 0,02 | 0,03 | 0,10 | 0,02 | 0    |
| 021 | 2-Propanone, 1-hydroxy-3-(4-hydroxy-3-methoxyphenyl)- | 1693 | 1736              | 196            | 0,01 | 0,01  | 0,15 | 0,01 | 0,01 | 0     | 0     | 0,01 | 0    | 0,35 | 0    | 0,01 | 0    | 0,02 | 0,41 | 0    |
| 022 | Desaspidinol                                          | 1736 |                   | 167            | 0,02 | 0,05  | 0,01 | 0,04 | 0,10 | 0,08  | 0,01  | 0,03 | 0    | 0,01 | 0    | 0,08 | 0,03 | 0,38 | 0,01 | 0    |
| 023 | Tetradecanoic acid                                    | 1744 | 1752              | 228            | 0,01 | 0,01  | 0,17 | 0,01 | 0,01 | 0     | 0,33  | 0,01 | 0,02 | 0,24 | 0,01 | 0,01 | 0,01 | 0,03 | 0,22 | 0    |
| 024 | 3,5-Dimethoxy-4-hydroxyphenylacetic acid              | 1755 | 1744              | 167 212        | 0,02 | 0,05  | 0,09 | 0,02 | 0,06 | 0     | 0,03  | 0,04 | 0    | 0,05 | 0    | 0,03 | 0,08 | 0,32 | 0,12 | 0    |
| 025 | Dehydrovomifoliol                                     | 1767 | 1800              | 124            | 0,02 | 0,03  | 0,21 | 0,02 | 0,05 | 0,25  | 0,27  | 0,07 | 0    | 0,42 | 0    | 0,05 | 0,19 | 0,24 | 0,39 | 0    |
| 026 | Acetosyringon                                         | 1783 | 1744              | 181            | 0,08 | 0,08  | 0    | 0,06 | 0,13 | 0,58  | 0,10  | 0,12 | 0    | 0,01 | 0    | 0,09 | 0,03 | 0,63 | 0,06 | 0    |
| 027 | 3,4-Dimethoxycinnamic acid                            | 1792 | 1926              | 208            | 0,01 | 0,01  | 0,01 | 0,05 | 0,05 | 0,49  | 0,47  | 0,04 | 0    | 0,01 | 0    | 0,02 | 0,02 | 0,24 | 0,01 | 0    |
| 028 | Neophytadiene                                         | 1836 | 1842              | 123            | 0,04 | 0     | 0,01 | 0,04 | 0,14 | 0,37  | 0,26  | 0,09 | 0,32 | 0,01 | 0,08 | 0,01 | 0,15 | 0,11 | 0,01 | 0,39 |
| 029 | Pentadecanoic acid                                    | 1838 | 1848              | 242            | 0,01 | 0,01  | 0,01 | 0,01 | 0,01 | 0     | 0,17  | 0,01 | 0    | 0,01 | 0    | 0,01 | 0,01 | 0,02 | 0,02 | 0    |
| 030 | Neophytadiene 2                                       | 1839 | 1842              | 123            | 0,03 | 0     | 0,01 | 0,01 | 0,02 | 0,17  | 0,01  | 0,03 | 0,07 | 0,01 | 0,02 | 0,01 | 0,04 | 0,08 | 0,01 | 0,06 |
| 031 | 1-Hexadecanol                                         | 1869 | 1880              | 83             | 0,03 | 0,03  | 0,01 | 0,06 | 0,05 | 0,25  | 0     | 0    | 0,28 | 0,01 | 0    | 0,01 | 0,01 | 0,02 | 0,01 | 0    |

|     |                                                                 |      |      |        |       |       |       |       |       |       |       |       |       |       |       |       |       |       |       |       |
|-----|-----------------------------------------------------------------|------|------|--------|-------|-------|-------|-------|-------|-------|-------|-------|-------|-------|-------|-------|-------|-------|-------|-------|
| 032 | Neophytadiene 3                                                 | 1883 | 1842 | 123    | 0,01  | 0     | 0,01  | 0     | 0,03  | 0,11  | 0     | 0,05  | 0,14  | 0     | 0,03  | 0     | 0,04  | 0,03  | 0     | 0,09  |
| 033 | Hexadecanoic acid, methyl ester                                 | 1924 | 1953 | 236    | 0,13  | 0,07  | 0,03  | 0,01  | 0,06  | 0     | 0,04  | 0,34  | 0,85  | 0,03  | 0,01  | 0,02  | 0,03  | 0,08  | 0,01  | 0,05  |
| 034 | Palmitoleic acid                                                | 1926 | 1926 | 74     | 0,01  | 0,03  | 0,01  | 0,31  | 0,07  | 0     | 0,16  | 0,02  | 0     | 0,01  | 0     | 0,01  | 0,03  | 0,11  | 0,01  | 0     |
| 035 | n-Hexadecanoic acid                                             | 1943 | 1942 | 256    | 0,19  | 2,19  | 0,06  | 0,29  | 1,80  | 0,30  | 0,82  | 0,35  | 0,18  | 0,04  | 0,11  | 0,26  | 0,55  | 1,72  | 0,07  | 0,11  |
| 036 | Heptadecanoic acid                                              | 2060 | 2071 | 37,270 | 0     | 0,01  | 0     | 0,01  | 0     | 0     | 0,01  | 0,01  | 0     | 0     | 0     | 0,01  | 0,01  | 0,01  | 0,01  | 0     |
| 037 | Aucuparin                                                       | 2050 | 2063 | 82     | 0,30  | 0,19  | 0,03  | 0,16  | 0,39  | 0     | 0,09  | 0,78  | 0     | 0,04  | 0     | 0,04  | 0,13  | 0,51  | 0,04  | 0     |
| 038 | 1-Octadecanol                                                   | 2073 | 2074 | 97     | 0,04  | 0,07  | 0,03  | 0,04  | 0,28  | 0     | 0,06  | 0     | 0,40  | 0,01  | 0,48  | 0,01  | 0,07  | 0,17  | 0,09  | 0,10  |
| 039 | Heneicosane                                                     | 2098 | 2100 | 57     | 0     | 0     | 0     | 0     | 0     | 0     | 0,11  | 0,15  | 0     | 0     | 0     | 0,01  | 0     | 0     | 0     | 0,04  |
| 040 | Phytol                                                          | 2107 | 2114 | 71     | 1,97  | 1     | 0,62  | 1,31  | 2,12  | 4,57  | 0,09  | 4,12  | 14,24 | 0,38  | 1,07  | 0,60  | 1,05  | 1,21  | 0,40  | 4,07  |
| 041 | Linoleic acid                                                   | 2113 | 2112 | 280    | 0,02  | 0,03  | 0,02  | 0,01  | 0,03  | 0,03  | 0,06  | 0,04  | 0     | 0,01  | 0,01  | 0,01  | 0,02  | 0,05  | 0,02  | 0     |
| 042 | Linolenic acid                                                  | 2117 | 2115 | 79     | 0,20  | 0,27  | 0,01  | 0,07  | 0,51  | 0,50  | 0,41  | 0,65  | 0     | 0,01  | 0,02  | 0,03  | 0,15  | 0,29  | 0,01  | 0     |
| 043 | Oleic acid                                                      | 2119 | 2134 | 264    | 0,01  | 0,01  | 0,01  | 0,01  | 0,01  | 0,01  | 0,03  | 0,01  | 0     | 0,01  | 0,01  | 0,01  | 0,01  | 0,02  | 0,01  | 0     |
| 044 | Octadecanoic acid                                               | 2143 | 2153 | 284    | 0,03  | 0,13  | 0,01  | 0,06  | 0,16  | 0,07  | 0,20  | 0,15  | 0,02  | 0,01  | 0,01  | 0,02  | 0,08  | 0,22  | 0,02  | 0     |
| 045 | 2'-Methoxyaucuparin                                             | 2169 |      | 260    | 0,01  | 0,01  | 0,07  | 0,01  | 0     | 0     | 0,06  | 0     | 0     | 0,08  | 0     | 0,02  | 0,27  | 0,14  | 0,25  | 0     |
| 046 | Docosane                                                        | 2201 | 2200 | 57     | 0,01  | 0,02  | 0     | 0     | 0,03  | 0     | 0     | 0     | 0     | 0     | 0     | 0     | 0,01  | 0,02  | 0,01  | 0,06  |
| 047 | Benzyl β-D-glucoside                                            | 2228 |      | 91     | 0,19  | 0,41  | 0,27  | 0,51  | 0,21  | 0,21  | 0,18  | 1,20  | 0     | 0,57  | 0     | 0,04  | 0,10  | 2,48  | 0,40  | 0     |
| 048 | 1-Eicosanol                                                     | 2275 | 2273 | 97     | 0     | 0     | 0,01  | 0     | 0     | 0     | 0     | 0     | 0,46  | 0,01  | 0,12  | 0     | 0     | 0     | 0,03  | 0     |
| 049 | Tricosane                                                       | 2304 | 2304 | 57     | 0,05  | 0,03  | 0     | 0     | 0,03  | 0,34  | 0,10  | 0     | 0,16  | 0     | 0,05  | 0     | 0,02  | 0,01  | 0,03  | 0,15  |
| 050 | 4,8,12,16-Tetramethylheptadecan-4-olide                         | 2331 | 2364 | 99     | 0,04  | 0,10  | 0,02  | 0,01  | 0,08  | 0,04  | 0,01  | 0,03  | 0,83  | 0,03  | 0,30  | 0,01  | 0,07  | 0,18  | 0,05  | 0,15  |
| 051 | Eicosanoic acid                                                 | 2343 | 2366 | 312    | 0,02  | 0,13  | 0,01  | 0,05  | 0,09  | 0     | 0,20  | 0,33  | 0     | 0,01  | 0     | 0,01  | 0,08  | 0,14  | 0,02  | 0     |
| 052 | 1-Heneicosanol                                                  | 2373 | 0    | 97     | 0     | 0,07  | 0,01  | 0     | 0     | 0     | 0     | 0     | 0     | 0,01  | 0     | 0     | 0,01  | 0,01  | 0,01  | 0     |
| 053 | Tetracosane                                                     | 2404 | 2404 | 57     | 0,01  | 0     | 0     | 0     | 0     | 0     | 0     | 0     | 0,09  | 0     | 0,02  | 0     | 0     | 0     | 0,01  | 0,04  |
| 054 | 1,1'-Biphenyl, 6-hydroxy-4,2',3',4'-tetramethoxy-               | 2413 | 0    | 290    | 0,01  | 0,01  | 0,01  | 0,01  | 0     | 0     | 0,10  | 0,01  | 0     | 0,01  | 0     | 0,02  | 0,16  | 0,05  | 0,04  | 0     |
| 055 | Octadecanamide, N-ethyl                                         | 2434 |      | 87     | 0     | 0,03  | 0     | 0     | 0     | 0     | 0     | 0     | 0     | 0     | 0,01  | 0     | 0,03  | 0,01  | 0,01  | 0     |
| 056 | Behenic alcohol                                                 | 2472 | 2457 | 385    | 0     | 0     | 0,05  | 0     | 0     | 0     | 0     | 1,11  | 0,18  | 0,04  | 0,14  | 0     | 0     | 0     | 0,06  | 5,65  |
| 057 | Dehydroabietic acid                                             | 2477 | 2475 | 97     | 0     | 0     | 0     | 0     | 0     | 0     | 0,03  | 0     | 0,02  | 0     | 0     | 0     | 0     | 0     | 0     | 0     |
| 058 | Prunasin                                                        | 2477 | 0    | 117    | 44,46 | 62,50 | 22,03 | 54,99 | 73,13 | 44,23 | 36,18 | 19,75 | 0,05  | 11,86 | 0     | 20,27 | 30,01 | 31,79 | 3,42  | 0     |
| 059 | Pentacosane                                                     | 2501 | 2504 | 57     | 0     | 0     | 0     | 0     | 0     | 0     | 0     | 0     | 0,13  | 0,01  | 0,03  | 0     | 0     | 0     | 0,01  | 0     |
| 060 | Docosanoic acid                                                 | 2546 | 2567 | 340    | 0,10  | 0,45  | 0,03  | 0,20  | 0,29  | 0     | 0,70  | 0,50  | 0     | 0,03  | 0     | 0,03  | 0,22  | 0,42  | 0,09  | 0     |
| 061 | Mm 318 C <sub>20</sub> H <sub>30</sub> O <sub>3</sub>           | 2604 | 2366 | 207    | 0,33  | 0     | 0,19  | 0,10  | 0,28  | 0     | 0,01  | 0,05  | 0,23  | 0,93  | 0,81  | 0,13  | 0,05  | 0,51  | 2,38  | 0,52  |
| 062 | Hexacosane                                                      | 2600 | 2600 | 57     | 0     | 0     | 0,01  | 0     | 0     | 0     | 0     | 0     | 0,11  | 0,01  | 0,04  | 0     | 0     | 0     | 0,03  | 0,11  |
| 063 | Tetracosanal                                                    | 2614 | 2614 | 334    | 0,01  | 0,03  | 0     | 0,01  | 0,02  | 0     | 0,04  | 0,01  | 0     | 0     | 0,01  | 0     | 0     | 0,01  | 0     | 0     |
| 064 | 1-Tetracosanol                                                  | 2679 | 2678 | 97     | 2,09  | 0,29  | 0,27  | 0     | 0,19  | 0     | 0     | 1,35  | 0     | 0,31  | 0     | 0     | 0,35  | 0,46  | 0,38  | 0,27  |
| 065 | Heptacosane                                                     | 2698 | 2704 | 57     | 0     | 0     | 0,01  | 0     | 0     | 0     | 0     | 0     | 0,03  | 0,02  | 0,01  | 0     | 0     | 0     | 0,01  | 0,06  |
| 066 | Tetracosanoic acid                                              | 2744 | 2685 | 368    | 0     | 0,08  | 0,05  | 0,04  | 0,09  | 0     | 0,17  | 0,08  | 0     | 0,08  | 0     | 0     | 0,03  | 0,06  | 0,16  | 0     |
| 067 | Mm 334 c 95, 107 C <sub>20</sub> H <sub>30</sub> O <sub>4</sub> | 2787 | -    | 207    | 0,54  | 0,30  | 0,69  | 0,25  | 0,16  | 0     | 0     | 0,09  | 0,07  | 2,93  | 1,21  | 0,16  | 0,06  | 0,53  | 5,69  | 0,18  |
| 068 | Mm 332 c 97 C <sub>20</sub> H <sub>28</sub> O <sub>4</sub>      | 2801 | -    | 207    | 0,72  | 0     | 0,51  | 0,42  | 0,34  | 0,56  | 0     | 0,17  | 0,31  | 1,53  | 1,53  | 3,10  | 0,07  | 0,65  | 1,69  | 0,56  |
| 069 | Tetracosyl acetate                                              | 2804 | 2808 | 97     | 0     | 0,02  | 0     | 0     | 0,03  | 0     | 0     | 0,35  | 0     | 0     | 1,44  | 0     | 0,01  | 0,03  | 0     | 0     |
| 070 | Mm 334 c 95, 107 C <sub>20</sub> H <sub>30</sub> O <sub>4</sub> | 2804 | 0    | 207    | 3,26  | 0,22  | 3,36  | 1,48  | 0,17  | 0     | 0     | 1,13  | 0     | 4,40  | 20,38 | 2,34  | 0,84  | 3,87  | 12,42 | 2,49  |
| 071 | Squalene                                                        | 2811 | 2817 | 69     | 0,84  | 1,35  | 6,97  | 1,17  | 2,72  | 1,39  | 8,45  | 0,63  | 0,67  | 4,92  | 0     | 1,02  | 0,86  | 4,66  | 9,50  | 14,19 |
| 072 | Hexacosanal                                                     |      | 2832 | 57, 82 | 0     | 0     | 0     | 0     | 0     | 0     | 0     | 0     | 0     | 0     | 0     | 0     | 0     | 0     | 0     | 0     |
| 073 | Tocospiro A                                                     | 2825 | 2860 | 419    | 0,09  | 0,19  | 0,23  | 0     | 0,10  | 0     | 0     | 0,48  | 0,14  | 0,28  | 0     | 0,02  | 0,15  | 0,24  | 0,51  | 0     |
| 074 | Mm 332 C <sub>20</sub> H <sub>28</sub> O <sub>4</sub>           | 2831 | -    | 207    | 0,72  | 0     | 0,47  | 0,44  | 0,12  | 0,69  | 0     | 0,23  | 0     | 1,48  | 4,37  | 0,16  | 0,08  | 0,85  | 1,25  | 0,84  |
| 075 | Tocospiro B                                                     | 2845 | 2882 | 419    | 0,22  | 0,40  | 0,17  | 0     | 0,21  | 0     | 0     | 0,76  | 0,13  | 0,25  | 0     | 0,03  | 0,19  | 0,45  | 0,51  | 1,38  |
| 076 | 1-Hexacosanol                                                   | 2883 | 2852 | 97     | 0,73  | 0,08  | 0     | 0,06  | 0,01  | 0     | 0     | 0,36  | 0     | 0     | 0     | 0,17  | 0,13  | 0,08  | 0     | 0     |

|     |                           |      |       |         |       |      |       |       |      |      |      |       |       |       |       |       |       |       |       |       |
|-----|---------------------------|------|-------|---------|-------|------|-------|-------|------|------|------|-------|-------|-------|-------|-------|-------|-------|-------|-------|
| 077 | Nonacosane                | 2900 | 2900  | 57      | 0,02  | 0    | 0     | 0     | 0    | 0    | 0    | 0,07  | 0     | 0,03  | 0     | 0,01  | 0     | 0     | 0     |       |
| 078 | A-Neoeleane-3(5),12-diene | 2904 |       | 365     | 0,04  | 0    | 0,03  | 0     | 0    | 0    | 0,18 | 0     | 0     | 0,03  | 0,08  | 0,01  | 0,01  | 0     |       |       |
| 079 | Diterpenic acid Mm 358    | 2914 |       | 207     | 2,59  | 0,38 | 2,68  | 1,73  | 0,37 | 1,07 | 0    | 0,58  | 0,27  | 14,08 | 28,19 | 0,57  | 0,12  | 2,78  | 22,43 | 0,73  |
| 080 | Stigmastan-3,5,22-trien   | 3025 | 2981  | 394     | 0,08  | 0,12 | 0,33  | 0,07  | 0,14 | 0,30 | 0,13 | 0,23  | 0     | 0,38  | 0,27  | 0,06  | 0,15  | 0,33  | 0,89  | 0,53  |
| 081 | Stigmasta-3,5-diene       | 3046 |       | 396     | 0,02  | 0,06 | 0,07  | 0,05  | 0,07 | 0    | 0    | 0,12  | 0     | 0     | 0,15  | 0,03  | 0,04  | 0,07  | 0     | 0,15  |
| 082 | Cholesterol               | 3054 | 3087  | 386     | 0     | 0    | 0     | 0     | 0    | 0    | 0    | 0,01  | 0     | 0     | 0     | 0,03  | 0     | 0     | 0,02  | 0     |
| 083 | Vitamin E                 | 3084 | 3138  | 430     | 0,27  | 0,68 | 4,80  | 1,48  | 1,21 | 1,51 | 4,58 | 0,27  | 2,43  | 2,82  | 0     | 0,43  | 0,33  | 0,57  | 7,91  | 2,81  |
| 084 | Campesterol               | 3150 | 3131  | 400     | 0,04  | 0    | 0     | 0     | 0    | 0    | 0    | 0,11  | 4,59  | 0,05  | 0     | 0     | 0     | 0     | 0,07  | 0     |
| 085 | $\beta$ -Sitosterol       | 3232 | 3230  | 414     | 1,16  | 0    | 0,69  | 1,73  | 0,01 | 0    | 0    | 11,12 | 0     | 0,44  | 0,92  | 1,85  | 1,51  | 0,97  | 1,03  | 0     |
| 086 | Fucosterol                | 3264 | 3293  | 314     | 0,21  | 0    | 0,03  | 0     | 0    | 0    | 0    | 0,45  | 0     | 0,02  | 0     | 0     | 0,46  | 0     | 0,03  | 1,27  |
| 087 | $\beta$ -Amyrin           | 3245 | 3337  | 218     | 0,19  | 0    | 0,05  | 1,58  | 0    | 0    | 0    | 2,03  | 46,97 | 0,13  | 0     | 0,71  | 1,66  | 0,29  | 0,03  | 0     |
| 088 | Lup-20(29)-en-3-one       | 3267 | 3384  | 424     | 0     | 0,44 | 0,08  | 0,43  | 0,24 | 0    | 0,94 | 0,42  | 0     | 0,08  | 1,69  | 1,22  | 0,23  | 0,94  | 0,10  | 0     |
| 089 | $\alpha$ -Amyrin          | 3275 | 3376  | 218     | 0     | 0    | 0,05  | 0     | 0    | 0    | 0    | 0     | 0     | 0,09  | 0     | 0     | 0     | 0     | 0,06  | 0     |
| 090 | Lupeol                    | 3288 | 3270  | 426     | 22,33 | 4,80 | 48,82 | 13,42 | 0,71 | 0    | 0    | 34,16 | 25,47 | 45,59 | 28,21 | 55,51 | 46,81 | 38,38 | 20,21 | 59,23 |
| 091 | Not identified Mm 444     | 3292 |       | 125,175 | 0,24  | 0    | 0,51  | 0,28  | 0    | 0    | 0    | 1,66  | 0,91  | 2,13  | 0,66  | 1,16  | 0,87  | 0,62  | 0,82  | 0     |
| 092 | Stigmasta-3,5-dien-7-one  | 3305 |       | 174     | 0,25  | 0    | 0,09  | 0,20  | 0    | 0    | 0,21 | 0,08  | 0     | 0,08  | 0     | 0     | 0,12  | 0,74  | 0,13  | 0     |
| 093 | Not identified Mm 442     | 3314 |       | 125     | 0,16  | 0    | 0     | 0,31  | 0    | 0    | 0    | 0,34  | 0,44  | 0,18  | 0,23  | 0,46  | 0,32  | 0     | 0     | 0     |
| 094 | Allobetulin               | 3320 |       | 189     | 0     | 0    | 0,23  | 0     | 0    | 0    | 0    | 0,35  | 0     | 0,16  | 0,34  | 0     | 0,25  | 0,55  | 0     | 0     |
| 095 | $\beta$ -Sitostenone      | 3339 | 3483  | 412     | 0,23  | 0,21 | 0,05  | 0,20  | 0,15 | 0    | 0,40 | 0,07  | 0     | 0,04  | 0     | 0,16  | 0,12  | 0,40  | 0,04  | 0,52  |
| 096 | Lupeol acetate            | 3409 |       | 189     | 0     | 0    | 0     | 1,52  | 0    | 0    | 0    | 0,50  | 0     | 0,59  | 0     | 1,75  | 0     | 0     | 0     | 0     |
| 097 | Taraxasterol              | 3437 |       | 189     | 1,33  | 0    | 0     | 0     | 0    | 0    | 0    | 0,41  | 0     | 0     | 0     | 0     | 0     | 1,61  | 0     | 0     |
| 098 | Dotriacontanal            | 3442 | 3451* | 82      | 0,19  | 0    | 0,19  | 0,25  | 0    | 0    | 0    | 0,42  | 0     | 0,21  | 0,34  | 1,28  | 0,41  | 0,51  | 2,36  | 0     |
| 099 | Not identified            | 3448 |       | 428     | 0,24  | 0    | 0,34  | 0     | 0    | 0    | 0    | 0,17  | 0     | 0     | 0     | 0,43  | 0,10  | 0     | 2,70  | 0,40  |
| 100 | Betulinaldehyde           | 3551 |       | 189     | 1,69  | 0    | 0     | 3,35  | 0    | 0    | 0    | 0     | 0     | 0     | 0     | 1,38  | 0,31  | 2,19  | 0     | 0,52  |
| 101 | Betulin                   | 3572 |       | 189     | 0,08  | 0    | 0     | 0     | 0    | 0    | 0    | 0,09  | 0     | 0     | 0     | 2,98  | 0     | 0     | 0     | 0     |

\*\* estimated by  $RI_{lit}$  of homologues
